# Supplementary material for: Effects of the COVID-19 Pandemic on Treatment Efficiency for Traumatic Brain Injury in the Emergency Department: A Multicenter Study in Taiwan
Source: J Clin Med. 2021 Nov 15;10(22):5314. doi: 10.3390/jcm10225314 (PMC8621260; doi:10.3390/jcm10225314)
Supplement: Supplementary file 1 [file jcm-10-05314-s001.zip › Table S1.pdf]

**Table S1.** The neurosurgical procedures and its frequency in the pre-pandemic and pandemic periods.

| <b>Neurosurgical procedures (no.)</b>                                       | <b>Pre-pandemic period<br/>corresponding to P1</b> | <b>P1</b> | <b>Pre-pandemic period<br/>corresponding to P2</b> | <b>P2</b> |
|-----------------------------------------------------------------------------|----------------------------------------------------|-----------|----------------------------------------------------|-----------|
| Removal of epidural hematoma                                                | 1                                                  | 1         | 0                                                  | 0         |
| Removal of subdural hematoma                                                | 8                                                  | 0         | 5                                                  | 3         |
| ICP monitoring                                                              | 0                                                  | 1         | 4                                                  | 2         |
| External ventricular drainage                                               | 0                                                  | 1         | 0                                                  | 0         |
| Removal of epidural hematoma and ICP monitoring                             | 5                                                  | 4         | 1                                                  | 0         |
| Removal of subdural hematoma and ICP monitoring                             | 9                                                  | 6         | 6                                                  | 10        |
| Removal of intracerebral hematoma and ICP monitoring                        | 4                                                  | 3         | 1                                                  | 1         |
| External ventricular drainage and ICP monitoring                            | 1                                                  | 0         | 0                                                  | 1         |
| Removal of epidural hematoma, subdural hematoma and ICP<br>monitoring       | 0                                                  | 2         | 0                                                  | 0         |
| Removal of epidural hematoma, intracerebral hematoma, and ICP<br>monitoring | 0                                                  | 0         | 0                                                  | 1         |
| Removal of subdural hematoma, intracerebral hematoma, and ICP<br>monitoring | 1                                                  | 3         | 1                                                  | 1         |
| Removal of epidural hematoma, craniectomy, and ICP monitoring               | 1                                                  | 0         | 0                                                  | 0         |
| Removal of subdural hematoma, craniectomy, and ICP monitoring               | 1                                                  | 0         | 1                                                  | 0         |
| Removal of intracerebral hematoma, craniectomy, and ICP monitoring          | 1                                                  | 1         | 0                                                  | 0         |

|                                                                                                         |   |   |   |   |
|---------------------------------------------------------------------------------------------------------|---|---|---|---|
| Removal of subdural hematoma, external ventricular drainage, and ICP monitoring                         | 3 | 1 | 0 | 1 |
| Removal of intracerebral hematoma, external ventricular drainage, and ICP monitoring                    | 0 | 0 | 3 | 0 |
| Removal of subdural hematoma, intracerebral hematoma, external ventricular drainage, and ICP monitoring | 0 | 0 | 0 | 1 |

---

ICP, Intracranial Pressure. P1, January to April 30, 2019; P2, May 11 to July 31, 2021. Pre-pandemic period refers to the same span from 2019.
